# Supplementary material for: Interaction of glycine, lysine, proline and histidine with dipalmitoylphosphatidylcholine lipid bilayers: a theoretical and experimental study
Source: Royal Society of Chemistry journal article supplement (doi:10.1039/c5ra03236a), 2015-01-01
Supplement: c5ra03236a1.pdf [file c5ra03236a1.pdf]

# Supplementary Information: Interaction of Glycine, Lysine, Proline and Histidine with Dipalmitoylphosphatidylcholine Lipid Bilayers: a Theoretical and Experimental Study<sup>†</sup>

Rodolfo D. Porasso,<sup>\*a</sup> Norma M. Ale,<sup>b</sup> Facundo Ciocco Aloia,<sup>c</sup> Diego Masone,<sup>c</sup> Mario G. Del Pópolo,<sup>c</sup> Aida Ben Altabef,<sup>b,d</sup> Andrea Gomez-Zavaglia,<sup>e</sup> Sonia B. Diaz,<sup>b</sup> and Jorge A. Vila<sup>a,f</sup>

Received Xth XXXXXXXXXXXX 20XX, Accepted Xth XXXXXXXXXXXX 20XX

First published on the web Xth XXXXXXXXXXXX 200X

DOI: 10.1039/b000000x

## 1 FTIR Experiments

Fig. 1 (a), (b) and (c) shows the  $\nu\text{C}=\text{O}$  band for different DPPC:Gly molar ratios, at three different temperatures (a) 298.2 K gel, (b) 314.2 K transition and (c) 323.2 K crystalline states.

Table 1 reports the experimental frequencies and the frequency shifts of both bonded and free C=O groups ( $\nu\text{C}=\text{O}_b$  and  $\nu\text{C}=\text{O}_f$ , respectively) at Gly:DPPC ratios within 0.0:1 and 4.0:1, and at three different temperatures, corresponding to the gel (298.2 K), the transition temperature (314.2 K) and the liquid crystalline (323.2 K) states.

Table 2 reports the experimental frequencies and the frequency shifts of both symmetric and antisymmetric stretching modes of the phosphate groups at three different temperatures, 298.2 K, 314.2 K and 323.2 K, in water solution.

Finally, Table 3 and Table 4 provide a complete set of FTIR measurements at different Gly:DPPC molar ratios.

<sup>†</sup> Electronic Supplementary Information (ESI) available: [details of any supplementary information available should be included here]. See DOI: 10.1039/b000000x/

<sup>a</sup> Instituto de Matemática Aplicada San Luis (IMASL), CONICET, Universidad Nacional de San Luis, Italia 1556, CP5700, Argentina; E-mail: rporasso@unsl.edu.ar

<sup>b</sup> Instituto de Química Física, Facultad de Bioquímica, Química y Farmacia, U.N.T. San Lorenzo 456, T4000CAN Tucumán, Argentina.

<sup>c</sup> CONICET & Facultad de Ciencias Exactas y Naturales, Universidad Nacional de Cuyo, Padre Jorge Contreras 1300, CP5500, Mendoza, Argentina.

<sup>d</sup> Instituto de Química del Noroeste (INQUINOA) CONICET, Tucumán, Argentina.

<sup>e</sup> Center for Research and Development in Food Cryotechnology (CCT-CONICET, La Plata) RA-1900, Argentina.

<sup>f</sup> Baker Laboratory of Chemical Biology, Cornell University, Ithaca, NY 14853-1301.

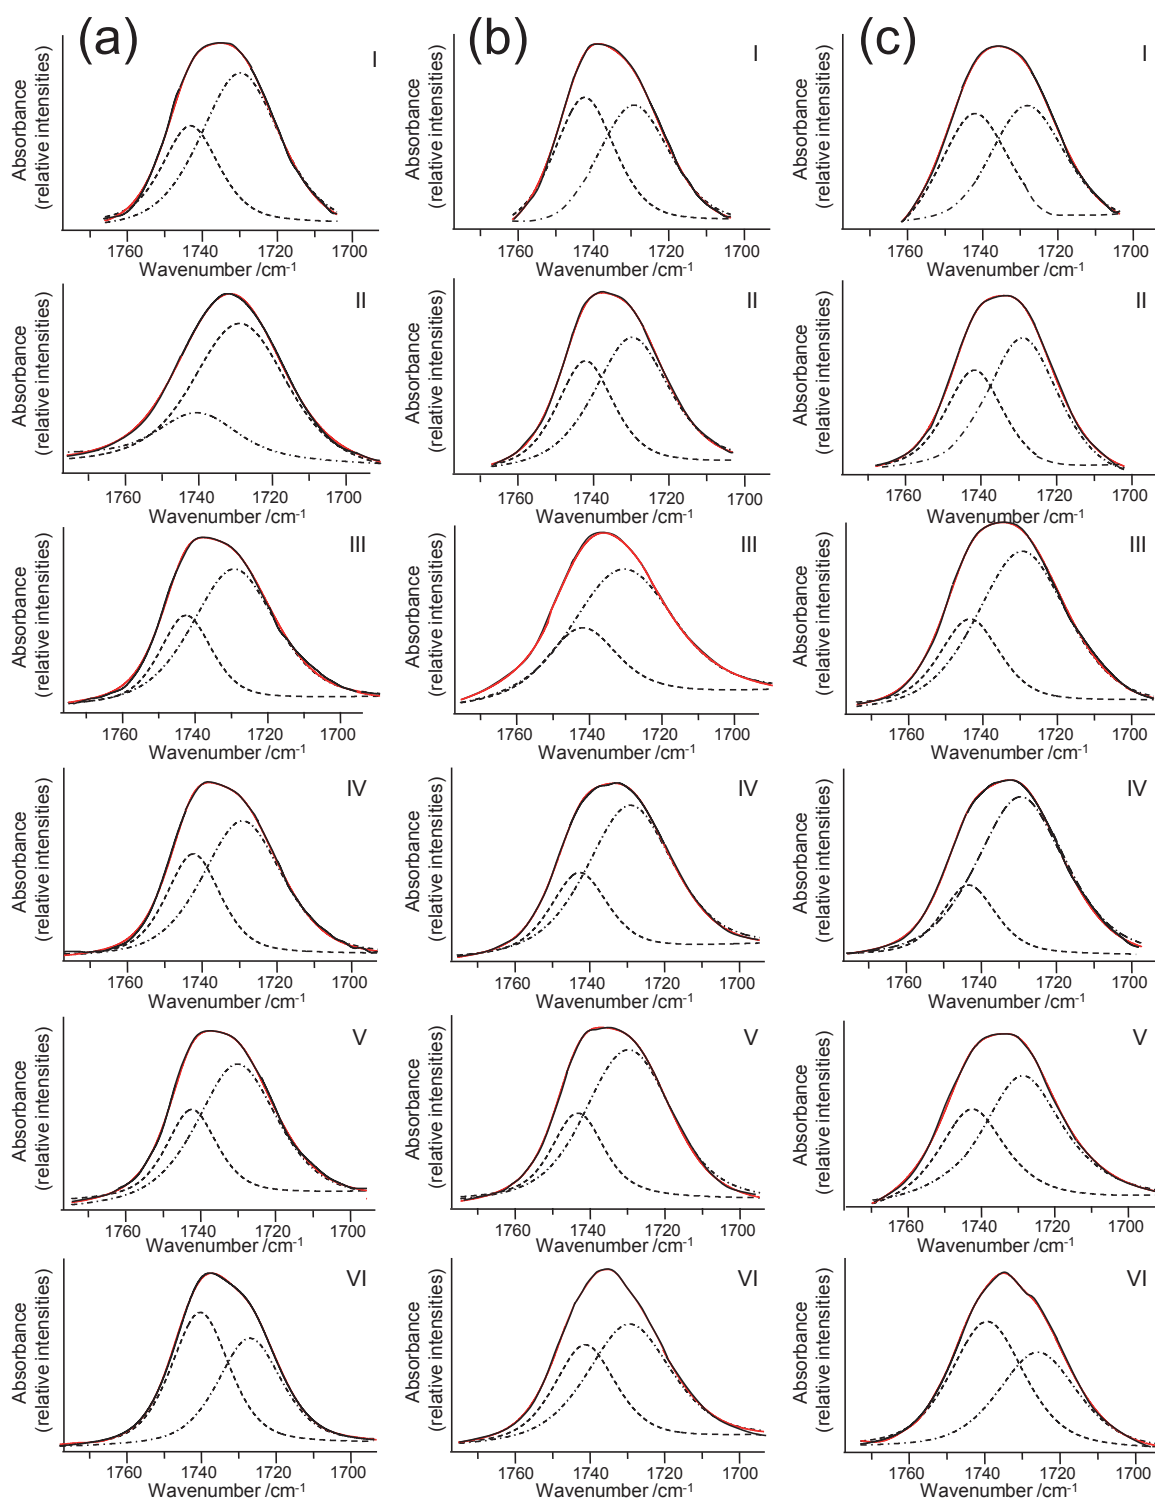

**Fig. 1** Deconvolution and curve fitting (Gaussian-Lorentzian functions) of the component bands for the two populations of carbonyl groups (free and H-bonded) at (a) 298.2 K, (b) 314.2 K and (c) 323.2 K. In all scripts, the experimental bands (full black line) and the cumulative peak fit (red lines), as well as the C=O<sub>free</sub> (dash line) and C=O<sub>bonded</sub> (dash dot line) populations are shown. Numbers I to VI denote different Gly:DPPC molar ratios: I: 0.0:1; II: 0.4:1; III: 0.9:1; IV: 2.0:1; V: 3.0:1; VI: 4.0:1.

**Table 1** Experimental frequencies values (with the corresponding standard deviation) in the free (labeled as subindex *f*) and H-bonded (labeled as subindex *b*) population of C=O groups at 298.2, 314.2 and 323.2 K in D<sub>2</sub>O. † In parenthesis and in bracket we listed the corresponding variations in the frequency, with respect of the 0.0:1 Gly/DPPC molar ratio, for the free and H-bonded populations of C=O groups, respectively

| Temperature | Molar ratio<br>Gly/DPPC | † $\nu_{\text{C=O}_f}$ | † $\nu_{\text{C=O}_b}$ |
|-------------|-------------------------|------------------------|------------------------|
| 298.2 K     | 0.0:1                   | 1742 ± 0.6             | 1730 ± 0.7             |
|             | 0.4:1                   | 1743 ± 0.3 (1)         | 1732 ± 0.5 [2]         |
|             | 0.9:1                   | 1742 ± 0.1 (0)         | 1729 ± 0.3 [-1]        |
|             | 2.0:1                   | 1742 ± 1.0 (0)         | 1729 ± 0.8 [-1]        |
|             | 3.0:1                   | 1741 ± 0.7 (-1)        | 1729 ± 0.4 [-1]        |
|             | 4.0:1                   | 1741 ± 0.1 (-1)        | 1728 ± 0.5 [-2]        |
| 314.2 K     | 0.0:1                   | 1742 ± 0.5             | 1729 ± 0.2             |
|             | 0.4:1                   | 1742 ± 0.5 (0)         | 1730 ± 0.5 [1]         |
|             | 0.9:1                   | 1743 ± 0.6 (1)         | 1731 ± 0.5 [2]         |
|             | 2.0:1                   | 1742 ± 0.6 (0)         | 1729 ± 0.8 [0]         |
|             | 3.0:1                   | 1742 ± 0.2 (0)         | 1729 ± 0.9 [0]         |
|             | 4.0:1                   | 1742 ± 0.1 (0)         | 1730 ± 0.3 [1]         |
| 323.2 K     | 0.0:1                   | 1742 ± 0.5             | 1728 ± 0.7             |
|             | 0.4:1                   | 1741 ± 0.9 (-1)        | 1728 ± 0.5 [0]         |
|             | 0.9:1                   | 1743 ± 0.5 (1)         | 1730 ± 0.3 [2]         |
|             | 2.0:1                   | 1742 ± 0.4 (0)         | 1729 ± 0.3 [1]         |
|             | 3.0:1                   | 1743 ± 0.2 (1)         | 1729 ± 0.5 [1]         |
|             | 4.0:1                   | 1739 ± 0.6 (-3)        | 1724 ± 0.3 [-4]        |

**Table 2** Experimental frequencies values (with the corresponding standard deviation) in the symmetric and antisymmetric stretching modes of the  $\text{PO}_2^-$  groups at 298.2, 314.2 and 323.2 K in  $\text{H}_2\text{O}$ . † In parenthesis and in bracket we listed the corresponding variations in the frequency, with respect of the 0.0:1 Gly/DPPC molar ratio, in the antisymmetric and symmetric stretching modes of the  $\text{PO}_2^-$  groups, respectively

| Temperature | Molar ratio<br>Gly/DPPC | † $\nu_{as}\text{PO}_2^-$ | † $\nu_s\text{PO}_2^-$ |
|-------------|-------------------------|---------------------------|------------------------|
| 298.2 K     | 0.0:1                   | 1233 ± 0.5                | 1090 ± 0.5             |
|             | 0.4:1                   | 1226 ± 1.5 (-7)           | 1089 ± 0.1 [-1]        |
|             | 0.9:1                   | 1224 ± 0.8 (-9)           | 1089 ± 0.5 [-1]        |
|             | 2.0:1                   | 1225 ± 1.0 (-8)           | 1090 ± 0.9 [0]         |
|             | 3.0:1                   | 1225 ± 0.9 (-8)           | 1089 ± 0.7 [-1]        |
|             | 4.0:1                   | 1224 ± 0.5 (-9)           | 1089 ± 0.7 [-1]        |
| 314.2 K     | 0.0:1                   | 1231 ± 0.5                | 1089 ± 0.1             |
|             | 0.4:1                   | 1231 ± 0.3 (0)            | 1088 ± 0.1 [-1]        |
|             | 0.9:1                   | 1229 ± 1.0 (-1)           | 1090 ± 0.5 [1]         |
|             | 2.0:1                   | 1229 ± 1.0 (-2)           | 1090 ± 0.5 [1]         |
|             | 3.0:1                   | 1230 ± 0.9 (-1)           | 1088 ± 1.0 [-1]        |
|             | 4.0:1                   | 1230 ± 0.9 (-1)           | 1088 ± 0.5 [-1]        |
| 323.2 K     | 0.0:1                   | 1234 ± 0.3                | 1088 ± 0.1             |
|             | 0.4:1                   | 1232 ± 0.5 (-2)           | 1088 ± 0.1 [0]         |
|             | 0.9:1                   | 1231 ± 1.0 (-3)           | 1089 ± 0.3 [1]         |
|             | 2.0:1                   | 1230 ± 0.8 (-4)           | 1088 ± 0.2 [0]         |
|             | 3.0:1                   | 1231 ± 0.8 (-3)           | 1088 ± 0.2 [0]         |
|             | 4.0:1                   | 1232 ± 1.0 (-2)           | 1088 ± 0.5 [0]         |

**Table 3** Frequency values of symmetric, antisymmetric stretching, and bending modes of  $\text{CH}_2$  y  $\text{CH}_3$  groups in the hydrophobic region of a DPPC bilayer in the presence of Gly. FTIR measurements performed at 298.2 K (gel phase).

| Molar ratio<br>Gly/DPPC | $\nu_{as}$<br>[ $\text{CH}_3$ ] | $\Delta\nu_{as}$<br>[ $\text{CH}_3$ ] | $\nu_s$<br>[ $\text{CH}_3$ ] | $\Delta\nu_s$<br>[ $\text{CH}_3$ ] | $\nu_{as}$<br>[ $\text{CH}_2$ ] | $\Delta\nu_{as}$<br>[ $\text{CH}_3$ ] | $\nu_s$<br>[ $\text{CH}_2$ ] | $\Delta\nu_s$<br>[ $\text{CH}_3$ ] | $\delta$<br>[ $\text{CH}_2$ ] | $\Delta\delta$<br>[ $\text{CH}_2$ ] |
|-------------------------|---------------------------------|---------------------------------------|------------------------------|------------------------------------|---------------------------------|---------------------------------------|------------------------------|------------------------------------|-------------------------------|-------------------------------------|
| 0.0:1                   | 2956                            | 0                                     | 2874                         | 0                                  | 2919                            | 0                                     | 2850                         | 0                                  | 1468                          | 0                                   |
| 0.4:1                   | 2955                            | -1                                    | 2873                         | -1                                 | 2919                            | 0                                     | 2850                         | 0                                  | 1468                          | 0                                   |
| 0.9:1                   | 2955                            | -1                                    | 2872                         | -2                                 | 2918                            | -1                                    | 2850                         | 0                                  | 1468                          | 0                                   |
| 2.0:1                   | 2955                            | -1                                    | 2873                         | -1                                 | 2918                            | -1                                    | 2850                         | 0                                  | 1468                          | 0                                   |
| 3.0:1                   | 2956                            | 0                                     | 2871                         | -3                                 | 2918                            | -1                                    | 2850                         | 0                                  | 1468                          | 0                                   |
| 4.0:1                   | 2956                            | 0                                     | 2874                         | 0                                  | 2918                            | -1                                    | 2850                         | 0                                  | 1468                          | 0                                   |

**Table 4** Frequency values of symmetric, antisymmetric stretching, and bending modes of  $\text{CH}_2$  y  $\text{CH}_3$  groups in the hydrophobic region of a DPPC bilayer in the presence of Gly. FTIR measurements performed at 323.2 K (liquid phase).

| Molar ratio<br>Gly/DPPC | $\nu_{as}$<br>[ $\text{CH}_3$ ] | $\Delta\nu_{as}$<br>[ $\text{CH}_3$ ] | $\nu_s$<br>[ $\text{CH}_3$ ] | $\Delta\nu_s$<br>[ $\text{CH}_3$ ] | $\nu_{as}$<br>[ $\text{CH}_2$ ] | $\Delta\nu_{as}$<br>[ $\text{CH}_3$ ] | $\nu_s$<br>[ $\text{CH}_2$ ] | $\Delta\nu_s$<br>[ $\text{CH}_3$ ] | $\delta$<br>[ $\text{CH}_2$ ] | $\Delta\delta$<br>[ $\text{CH}_2$ ] |
|-------------------------|---------------------------------|---------------------------------------|------------------------------|------------------------------------|---------------------------------|---------------------------------------|------------------------------|------------------------------------|-------------------------------|-------------------------------------|
| 0.0:1                   | 2957                            | 0                                     | 2872                         | 0                                  | 2923                            | 0                                     | 2853                         | 0                                  | 1461                          | 0                                   |
| 0.4:1                   | 2956                            | -1                                    | 2874                         | 2                                  | 2923                            | 0                                     | 2852                         | -1                                 | 1456                          | -5                                  |
| 0.9:1                   | 2955                            | -2                                    | 2872                         | 0                                  | 2923                            | 0                                     | 2853                         | 0                                  | 1459                          | -2                                  |
| 2.0:1                   | 2955                            | -2                                    | 2872                         | 0                                  | 2923                            | 0                                     | 2853                         | 0                                  | 1462                          | 1                                   |
| 3.0:1                   | 2955                            | -2                                    | 2872                         | 0                                  | 2923                            | 0                                     | 2853                         | 0                                  | 1460                          | -1                                  |
| 4.0:1                   | 2955                            | -2                                    | 2872                         | 0                                  | 2923                            | 0                                     | 2852                         | -1                                 | 1458                          | -3                                  |

---

## 2 Methods: Molecular Dynamics Simulations

### 2.1 Criteria to ensure the stability of the Systems

In order to test whether the Umbrella Sampling simulations were long enough to ensure the convergence of the free energy profiles, each 100 ns MD trajectory was split into 5 sub-trajectories of 20 ns. Free energy profiles were computed from each sub-trajectory and used to compute the average profile and the corresponding statistical error. The results are shown in Figs. 2 to 7, and presented in the following order:

- Fig 2: Gly/DPPC system
- Fig 3: N<sup>δ1</sup>-H His/DPPC system
- Fig 4: N<sup>ε2</sup>-H His/DPPC system
- Fig 5: His<sup>+</sup>/DPPC system
- Fig 6: Lys<sup>+</sup>/DPPC system
- Fig 7: Pro/DPPC system

In all cases, it can be clearly appreciated that the free energy profiles obtained from the sub-trajectories fluctuate around the average curve. These data strongly suggest that the simulations have reached a steady state.

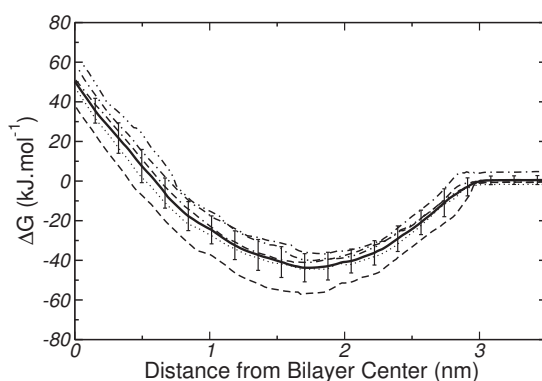

**Fig. 2** Free energy profiles for five subtrajectories of Gly, corresponding to: (—)  $\Delta t= 0-20\text{ns}$ , ( $\cdots$ )  $\Delta t= 20-40\text{ns}$ , ( $-\ - -$ )  $\Delta t= 40-60\text{ns}$ , ( $-\ \cdot - \cdot -$ )  $\Delta t= 60-80\text{ns}$  and ( $-\ \cdot - \cdot -$ )  $\Delta t= 60-80\text{ns}$ . Thick solid line is the average of the free energy with the corresponding statistical error.

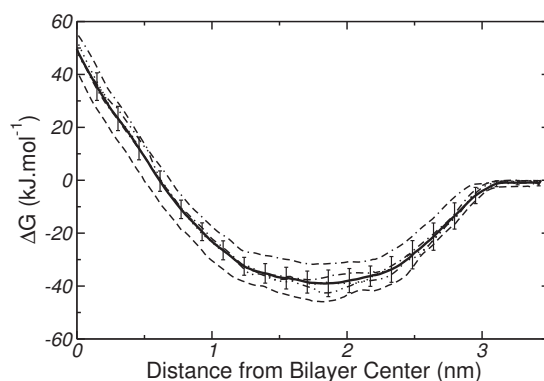

**Fig. 3** Free energy profiles for five subtrajectories of  $N^{\delta 1}$ -H His, corresponding to: (—)  $\Delta t= 0$ -20ns, ( $\cdots\cdots$ )  $\Delta t= 20$ -40ns, (---)  $\Delta t= 40$ -60ns, (-·-·-)  $\Delta t= 60$ -80ns and (- - - -)  $\Delta t= 60$ -80ns. Thick solid line is the average of the free energy with the corresponding statistical error.

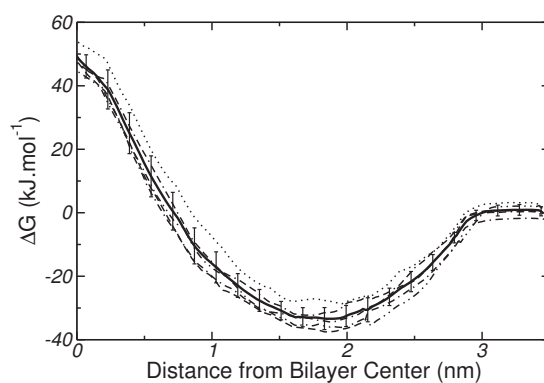

**Fig. 4** Free energy profiles for five subtrajectories of  $N^{\epsilon 2}$ -H His, corresponding to: (—)  $\Delta t= 0$ -20ns, ( $\cdots\cdots$ )  $\Delta t= 20$ -40ns, (---)  $\Delta t= 40$ -60ns, (-·-·-)  $\Delta t= 60$ -80ns and (- - - -)  $\Delta t= 60$ -80ns. Thick solid line is the average of the free energy with the corresponding statistical error.

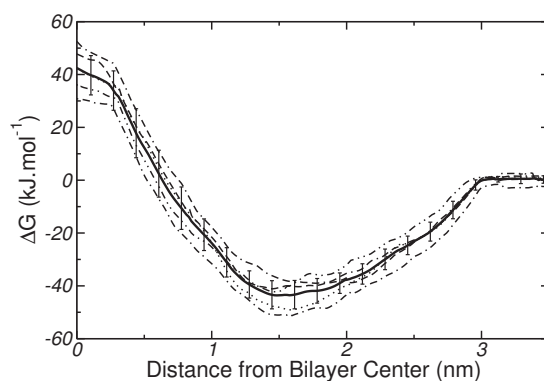

**Fig. 5** Free energy profiles for five subtrajectories of  $His^+$ , corresponding to: (—)  $\Delta t= 0$ -20ns, ( $\cdots\cdots$ )  $\Delta t= 20$ -40ns, (---)  $\Delta t= 40$ -60ns, (-·-·-)  $\Delta t= 60$ -80ns and (- - - -)  $\Delta t= 60$ -80ns. Thick solid line is the average of the free energy with the corresponding statistical error.

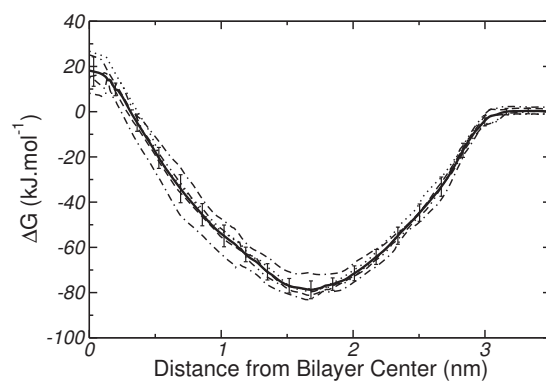

**Fig. 6** Free energy profiles for five subtrajectories of  $\text{Lys}^+$ , corresponding to: (—)  $\Delta t=0\text{-}20\text{ns}$ , ( $\cdots\cdots$ )  $\Delta t=20\text{-}40\text{ns}$ , (---)  $\Delta t=40\text{-}60\text{ns}$ , (- - - -)  $\Delta t=60\text{-}80\text{ns}$  and (- · - · - ·)  $\Delta t=60\text{-}80\text{ns}$ . Thick solid line is the average of the free energy with the corresponding statistical error.

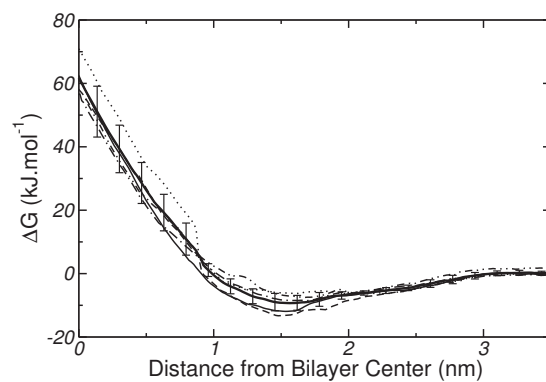

**Fig. 7** Free energy profiles for five subtrajectories of  $\text{Pro}$ , corresponding to: (—)  $\Delta t=0\text{-}20\text{ns}$ , ( $\cdots\cdots$ )  $\Delta t=20\text{-}40\text{ns}$ , (---)  $\Delta t=40\text{-}60\text{ns}$ , (- - - -)  $\Delta t=60\text{-}80\text{ns}$  and (- · - · - ·)  $\Delta t=60\text{-}80\text{ns}$ . Thick solid line is the average of the free energy with the corresponding statistical error.

---

## 2.2 Analysis of Hydration/Dehydration

Figure 8 shows the number of coordinating water molecules in the first hydration shield of the carbonyl oxygen atom of Gly. As can be appreciated, Gly losses around 11 water molecules when inserted into the lipid bilayer. This behavior is concomitant to the decrease in the number of H-bonds showed in the upper panel of Figure 13 of the main manuscript.

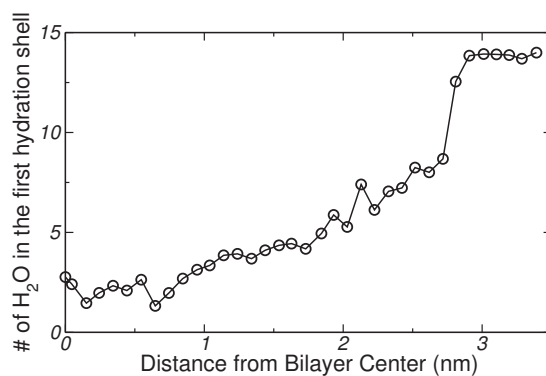

**Fig. 8** Number of coordinating water molecules in the first hydration shield of the carbonyl oxygen atom of Gly.
